# Supplementary material for: Chronic, intermittent treatment with a cannabinoid receptor agonist impairs recognition memory and brain network functional connectivity
Source: PubMed Central journal article supplement (PMC6220860; doi:10.1111/jnc.14549), 2018-09-27
Supplement: JNC-147-71-s001.pdf [file JNC-147-71-s001.pdf]

## Supplementary Material

Chronic, intermittent treatment with a cannabinoid receptor agonist impairs recognition memory and brain network functional connectivity

Francisco M Mouro<sup>1,2</sup>, Joaquim A Ribeiro<sup>1,2</sup>, Ana M Sebastião<sup>1,2\*</sup>, Neil Dawson<sup>3\*</sup>

<sup>1</sup> Instituto de Farmacologia e Neurociências, Faculdade de Medicina, Universidade de Lisboa, Portugal

<sup>2</sup> Instituto de Medicina Molecular, Faculdade de Medicina, Universidade de Lisboa, Portugal

<sup>3</sup> Division of Biomedical and Life Sciences, University of Lancaster, United Kingdom

\*co-senior authors

Corresponding author: AM Sebastião, Instituto de Farmacologia e Neurociências, Faculdade de Medicina, Av. Prof Egas Moniz, 1649-028 Lisboa, Portugal. Email: [anaseb@medicina.ulisboa.pt](mailto:anaseb@medicina.ulisboa.pt); tel: +351-21-7985183

**Table S1.** Body weight and blood parameters for animals undergoing the 14C-2-DG experiment

| <b>Treatment group</b> | <b>Weight (g)</b> | <b><sup>14</sup>C-2-DG in plasma (nCi/ml)</b> | <b>T-Test (diff)</b> | <b>Blood Glucose (nmol/L)</b> | <b>T-Test (diff)</b> |
|------------------------|-------------------|-----------------------------------------------|----------------------|-------------------------------|----------------------|
| <b>Vehicle</b>         | 25.87 ± 0.53      | 0.95 ± 0.16                                   | 0.55, n.s            | 11.12 ± 0.36                  | 0.74, n.s            |
| <b>WIN 55,212-2</b>    | 26.89 ± 0.35      | 1.36 ± 0.65                                   |                      | 10.96 ± 0.33                  | 0.16 ± 0.50          |

Chronic, intermittent WIN 55-212-2 administration did not significantly alter the weight of the animals. Blood glucose levels and 14C-2-DG levels at the moment of animal sacrifice show no significant statistical differences between WIN 55-212-2 treated animals and controls (n = 10, under unpaired Student's T Test).

**Table S2.** Local cerebral glucose utilisation (LCGU) in WIN 55,212-2 and control animals

| RoI         | Full name                                 | Mean Veh<br><sup>14</sup> C-2-DG UR | SE          | Mean Win<br><sup>14</sup> C-2-DG UR | SE          | T-test P<br>value |
|-------------|-------------------------------------------|-------------------------------------|-------------|-------------------------------------|-------------|-------------------|
| aPrL        | Anterior Prelimbic Cortex                 | 1.175                               | 3.27        | 1.196                               | 2.70        | 0.682             |
| FRA         | Frontal Association Area                  | 1.086                               | 2.33        | 1.110                               | 1.51        | 0.433             |
| DLO         | Dorsolateral Orbital Cortex               | 0.852                               | 2.20        | 0.905                               | 3.56        | 0.157             |
| LO          | Lateral Orbital Cortex                    | 1.390                               | 3.71        | 1.441                               | 4.72        | 0.540             |
| MO          | Medial Orbital Cortex                     | 1.119                               | 3.54        | 1.145                               | 5.24        | 0.715             |
| mPrL        | Medial Prelimbic Cortex                   | 1.097                               | 5.03        | 1.117                               | 3.07        | 0.758             |
| IL          | Infralimbic Cortex                        | 0.946                               | 6.25        | 0.976                               | 3.72        | 0.674             |
| AcbC        | Nucleus Accumbens Core                    | 0.880                               | 2.40        | 0.900                               | 1.86        | 0.442             |
| AcbSh       | Nucleus Accumbens Shell                   | 0.903                               | 1.99        | 0.910                               | 1.75        | 0.772             |
| DLST        | Dorsolateral Striatum                     | 1.249                               | 2.06        | 1.249                               | 1.64        | 0.994             |
| VMST        | Ventrolateral Striatum                    | 1.193                               | 2.14        | 1.178                               | 1.72        | 0.646             |
| MS          | Medial Septum                             | 1.010                               | 3.28        | 0.958                               | 3.12        | 0.245             |
| LS          | Lateral Septum                            | 0.830                               | 1.71        | 0.789                               | 4.21        | 0.249             |
| VDB         | Ventral Limb of Diagonal Band of Broca    | 1.056                               | 4.27        | 0.968                               | 3.78        | 0.139             |
| HDB         | Horizontal Limb of Diagonal Band of Broca | 0.854                               | 3.76        | 0.908                               | 3.65        | 0.238             |
| Piri        | Piriform Cortex                           | 1.299                               | 2.14        | 1.238                               | 2.65        | 0.157             |
| Ins         | Insular Cortex                            | 0.769                               | 2.23        | 0.774                               | 2.29        | 0.844             |
| CgI         | Cingulate Cortex                          | 1.069                               | 2.97        | 1.105                               | 2.57        | 0.399             |
| S1          | Somatosensory Cortex                      | 1.196                               | 2.89        | 1.256                               | 1.95        | 0.164             |
| AV          | Anteroventral Thalamus                    | 1.479                               | 6.12        | 1.491                               | 5.90        | 0.927             |
| AM          | Anteromedial Thalamus                     | 1.242                               | 5.91        | 1.166                               | 7.05        | 0.508             |
| aRT         | Reticular Thalamus                        | 1.504                               | 6.86        | 1.359                               | 6.86        | 0.328             |
| <b>GP</b>   | <b>Globus Pallidus</b>                    | <b>0.787</b>                        | <b>1.68</b> | <b>0.832</b>                        | <b>1.75</b> | <b>0.038*</b>     |
| <b>MD</b>   | <b>Mediodorsal Thalamus</b>               | <b>1.546</b>                        | <b>2.72</b> | <b>1.374</b>                        | <b>3.96</b> | <b>0.019*</b>     |
| VL          | Ventrolateral Thalamus                    | 1.689                               | 3.78        | 1.580                               | 2.00        | 0.139             |
| <b>Hab</b>  | <b>Habenula</b>                           | <b>1.484</b>                        | <b>2.32</b> | <b>1.307</b>                        | <b>4.30</b> | <b>0.012*</b>     |
| VM          | Ventromedial Thalamus                     | 1.312                               | 4.15        | 1.315                               | 2.74        | 0.958             |
| BLA         | Basolateral Amygdala                      | 0.723                               | 6.43        | 0.706                               | 5.60        | 0.786             |
| CoA         | Central Amygdala                          | 0.582                               | 3.04        | 0.586                               | 3.49        | 0.878             |
| MeA         | Medial Amygdala                           | 0.658                               | 5.18        | 0.639                               | 3.89        | 0.658             |
| RSc         | Retrosplenial Cortex                      | 1.473                               | 3.01        | 1.375                               | 3.17        | 0.133             |
| DH          |                                           |                                     |             |                                     |             |                   |
| Mol         | Dorsal Hippocampus, Molecular Layer       | 1.427                               | 2.03        | 1.410                               | 2.91        | 0.729             |
| DH          |                                           |                                     |             |                                     |             |                   |
| CA1         | Dorsal Hippocampus, CA1                   | 0.802                               | 2.35        | 0.770                               | 2.88        | 0.268             |
| DH          |                                           |                                     |             |                                     |             |                   |
| CA2         | Dorsal Hippocampus, CA2                   | 0.716                               | 1.54        | 0.731                               | 2.22        | 0.442             |
| DH          |                                           |                                     |             |                                     |             |                   |
| DG          | Dorsal Hippocampus, Dentate Gyrus         | 0.764                               | 3.17        | 0.845                               | 5.01        | 0.098             |
| MG          | Medial Geniculate                         | 1.584                               | 3.44        | 1.582                               | 2.46        | 0.972             |
| VH          |                                           |                                     |             |                                     |             |                   |
| LMol        | Ventral Hippocampus, Molecular Layer      | 1.255                               | 2.33        | 1.191                               | 3.65        | 0.222             |
| <b>DSub</b> | <b>Dorsal Subiculum</b>                   | <b>1.275</b>                        | <b>3.89</b> | <b>1.035</b>                        | <b>7.85</b> | <b>0.022*</b>     |
| VH          |                                           |                                     |             |                                     |             |                   |
| CA1         | Ventral Hippocampus, CA1                  | 0.982                               | 6.30        | 0.905                               | 3.01        | 0.264             |
| VH          |                                           |                                     |             |                                     |             |                   |
| CA3         | Ventral Hippocampus, CA3                  | 0.712                               | 4.13        | 0.711                               | 1.93        | 0.968             |
| VH          |                                           |                                     |             |                                     |             |                   |
| DG          | Ventral Hippocampus, Dentate Gyrus        | 0.700                               | 5.33        | 0.753                               | 2.74        | 0.225             |
| SNR         | Substantia Nigra pars Reticulata          | 0.757                               | 5.75        | 0.745                               | 5.77        | 0.850             |
| PRh         | Perirhinal Cortex                         | 0.880                               | 2.68        | 0.911                               | 3.09        | 0.404             |
| ENT         | Entorhinal Cortex                         | 0.729                               | 2.09        | 0.757                               | 1.99        | 0.207             |
| SNC         | Substantia Nigra pars Compacta            | 0.889                               | 3.62        | 0.885                               | 5.99        | 0.950             |
| MB          | Mammillary Body                           | 1.745                               | 3.49        | 1.616                               | 7.96        | 0.405             |
| VTA         | Ventral Tegmental Area                    | 1.254                               | 5.19        | 1.291                               | 6.63        | 0.732             |
| DR          | Dorsal Raphe                              | 0.892                               | 4.19        | 0.821                               | 4.62        | 0.203             |
| MR          | Medial Raphe                              | 0.988                               | 4.95        | 0.949                               | 6.40        | 0.620             |

Impact of chronic, intermittent WIN 55,212-2 administration on local cerebral glucose utilisation (LCGU). Data is shown as Mean  $\pm$  SEM <sup>14</sup>C-2-DG uptake ratio. In bold, statistically significant differences found between WIN 55,212-2 and vehicle treated animals are shown. \*denotes p<0.05, Student's t-test.

Table S3: Functional Connectivity of the Ventral Hippocampal Dorsal Subiculum

| RoI                                          | Control     |               | WIN55,212-2 Treated |               |
|----------------------------------------------|-------------|---------------|---------------------|---------------|
| anterior Prelimbic Cortex (aPrL)             | <b>1.57</b> | ± <b>0.03</b> | <b>1.13**</b>       | ± <b>0.06</b> |
| Frontal Association Cortex (FRA)             | <b>1.30</b> | ± <b>0.06</b> | <b>1.38</b>         | ± <b>0.02</b> |
| Dorsolateral Orbital Cortex (DLO)            | <b>0.99</b> | ± <b>0.04</b> | <b>1.41**</b>       | ± <b>0.06</b> |
| Lateral Orbital Cortex (LO)                  | <b>0.92</b> | ± <b>0.07</b> | 0.65                | ± 0.04        |
| Medial Orbital Cortex (MO)                   | <b>1.99</b> | ± <b>0.04</b> | <b>0.94***</b>      | ± <b>0.05</b> |
| medial Prelimbic Cortex (mPrL)               | <b>1.63</b> | ± <b>0.04</b> | <b>0.97***</b>      | ± <b>0.07</b> |
| Infralimbic Cortex (IL)                      | <b>1.49</b> | ± <b>0.03</b> | 0.47***             | ± 0.05        |
| Nucleus Accumbens Core (AcbC)                | 0.64        | ± 0.07        | 0.64                | ± 0.05        |
| Nucleus Accumbens Shell (AcbSh)              | 0.41        | ± 0.05        | 0.47                | ± 0.04        |
| Dorsolateral Striatum (DLST)                 | 0.48        | ± 0.06        | 0.70                | ± 0.05        |
| Ventromedial Striatum (VMST)                 | <b>0.99</b> | ± <b>0.06</b> | <b>1.16</b>         | ± <b>0.04</b> |
| Medial Septum (MS)                           | 0.46        | ± 0.04        | 0.77**              | ± 0.04        |
| Lateral Septum (LS)                          | 0.45        | ± 0.05        | 0.36                | ± 0.03        |
| Ventral Limb Diagonal Band Broca (VDB)       | <b>0.86</b> | ± <b>0.05</b> | <b>0.82</b>         | ± <b>0.06</b> |
| Horizontal Limb Diagonal Band of Broca (HDB) | 0.44        | ± 0.05        | 0.29                | ± 0.06        |
| Piriform Cortex (Piri)                       | <b>1.02</b> | ± <b>0.10</b> | <b>0.92</b>         | ± <b>0.07</b> |
| Insular Cortex (Ins)                         | 0.49        | ± 0.05        | 0.34                | ± 0.09        |
| Cingulate Cortex (Cg1)                       | <b>1.63</b> | ± <b>0.03</b> | <b>1.42</b>         | ± <b>0.05</b> |
| Somatosensory Cortex (S1)                    | <b>1.46</b> | ± <b>0.10</b> | 0.76***             | ± 0.03        |
| Anteroventral Nucleus (AV)                   | 0.39        | ± 0.03        | <b>1.01***</b>      | ± <b>0.08</b> |
| Anteromedial Nucleus (AM)                    | 0.61        | ± 0.06        | 0.57                | ± 0.07        |
| anterior Reticular Thalamus (aRT)            | 0.81        | ± 0.06        | 0.49                | ± 0.07        |
| Globus Pallidus (GP)                         | <b>1.19</b> | ± <b>0.07</b> | <b>1.82***</b>      | ± <b>0.03</b> |
| Mediodorsal Nucleus (MD)                     | 0.61        | ± 0.05        | <b>1.07**</b>       | ± <b>0.07</b> |
| Ventrolateral Nucleus (VL)                   | 0.67        | ± 0.07        | 0.69                | ± 0.06        |
| Habenula (Hab)                               | <b>0.87</b> | ± <b>0.10</b> | 0.72                | ± 0.07        |
| Ventromedial Nucleus (VM)                    | <b>1.28</b> | ± <b>0.03</b> | 0.49***             | ± 0.06        |
| Basolateral (BLA)                            | 0.37        | ± 0.05        | <b>1.06***</b>      | ± <b>0.06</b> |
| Central (CeA)                                | 0.60        | ± 0.07        | <b>0.93</b>         | ± <b>0.04</b> |
| Medial (MeA)                                 | 0.65        | ± 0.09        | 0.53                | ± 0.02        |
| Retrosplenial Cortex (RSC)                   | 0.54        | ± 0.13        | 0.49                | ± 0.06        |
| Molecular Layer (DH.Mol)                     | 0.63        | ± 0.07        | 0.57                | ± 0.07        |
| Cornu Ammonis 1 (DH.CA1)                     | 0.47        | ± 0.13        | <b>1.56***</b>      | ± <b>0.02</b> |
| Cornu Ammonis 2 (DH.CA2)                     | 0.79        | ± 0.05        | <b>1.21*</b>        | ± <b>0.07</b> |
| Dentate Gyrus (DH.DG)                        | 0.76        | ± 0.03        | <b>0.86</b>         | ± <b>0.06</b> |
| Medial Geniculate (MG)                       | 0.58        | ± 0.03        | <b>1.18***</b>      | ± <b>0.04</b> |
| Molecular Layer (VH.Mol)                     | <b>1.24</b> | ± <b>0.05</b> | <b>0.83*</b>        | ± <b>0.07</b> |
| Cornu Ammonis 1 (VH.CA1)                     | <b>1.48</b> | ± <b>0.05</b> | <b>1.53</b>         | ± <b>0.02</b> |
| Cornu Ammonis 3 (VH.CA3)                     | <b>1.55</b> | ± <b>0.11</b> | <b>0.99*</b>        | ± <b>0.06</b> |
| Dentate Gyrus (VH.DG)                        | 0.59        | ± 0.02        | <b>0.86*</b>        | ± <b>0.05</b> |
| Substantia Nigra pars Reticulata (SNR)       | 0.66        | ± 0.06        | <b>0.84</b>         | ± <b>0.06</b> |
| Perirhinal Cortex (PRh)                      | 0.53        | ± 0.08        | <b>1.58***</b>      | ± <b>0.03</b> |
| Entorhinal Cortex (EntC)                     | 0.68        | ± 0.03        | 0.56                | ± 0.05        |
| Substantia Nigra pars Compacta (SNC)         | 0.68        | ± 0.06        | <b>1.06*</b>        | ± <b>0.05</b> |
| Mamillary Body (MB)                          | <b>1.34</b> | ± <b>0.05</b> | <b>0.85**</b>       | ± <b>0.07</b> |
| Ventral Tegmental Area (VTA)                 | <b>1.15</b> | ± <b>0.07</b> | <b>1.43</b>         | ± <b>0.04</b> |
| Dorsal Raphé (DR)                            | <b>0.90</b> | ± <b>0.09</b> | <b>0.91</b>         | ± <b>0.06</b> |
| Median Raphé (MR)                            | <b>0.89</b> | ± <b>0.05</b> | <b>1.48**</b>       | ± <b>0.08</b> |

Functional connectivity of the dorsal subiculum (VH.DS) and its modification by chronic, intermittent WIN55,212-2 administration. Data shown represent the variable importance to the projection (VIP) as derived from partial least squares regression (PLSR) analysis with

the DSub as the “seed” brain region (dependent variable) and all other brain regions of interest (RoI) as the explanatory variables. Data were statistically analysed using Student’s t-test with Bonferroni post-hoc correction for multiple comparisons. Bold denote a significant functional connection to the seed region (95% confidence interval of the VIP statistic exceeds 0.8 threshold). \*denotes  $p < 0.05$ , \*\*denotes  $p < 0.01$  and \*\*\*denotes  $p < 0.001$  significant difference from control animals. DH denotes dorsal hippocampus, VH denotes ventral hippocampus.

Table S4. Functional Connectivity of the Habenula

| Rol                                          | Control     |               | WIN55,212-2 Treated |               |
|----------------------------------------------|-------------|---------------|---------------------|---------------|
| anterior Prelimbic Cortex (aPrL)             | <b>1.11</b> | ± <b>0.07</b> | 0.74                | ± 0.08        |
| Frontal Association Cortex (FRA)             | <b>1.26</b> | ± <b>0.11</b> | 0.74*               | ± 0.04        |
| Dorsolateral Orbital Cortex (DLO)            | <b>1.02</b> | ± <b>0.06</b> | 0.47***             | ± 0.05        |
| Lateral Orbital Cortex (LO)                  | <b>1.05</b> | ± <b>0.05</b> | 0.64***             | ± 0.06        |
| Medial Orbital Cortex (MO)                   | 0.78        | ± 0.07        | 0.53                | ± 0.06        |
| medial Prelimbic Cortex (mPrL)               | <b>1.01</b> | ± <b>0.03</b> | <b>0.89</b>         | ± <b>0.07</b> |
| Infralimbic Cortex (IL)                      | <b>1.24</b> | ± <b>0.04</b> | 0.80***             | ± 0.05        |
| Nucleus Accumbens Core (AcbC)                | 0.75        | ± 0.06        | <b>1.51***</b>      | ± <b>0.05</b> |
| Nucleus Accumbens Shell (AcbSh)              | 0.69        | ± 0.05        | <b>1.30***</b>      | ± <b>0.06</b> |
| Dorsolateral Striatum (DLST)                 | <b>1.57</b> | ± <b>0.04</b> | <b>1.15</b>         | ± <b>0.09</b> |
| Ventromedial Striatum (VMST)                 | <b>0.83</b> | ± <b>0.03</b> | <b>0.94</b>         | ± <b>0.09</b> |
| Medial Septum (MS)                           | <b>1.03</b> | ± <b>0.03</b> | <b>1.670***</b>     | ± <b>0.05</b> |
| Lateral Septum (LS)                          | <b>1.24</b> | ± <b>0.08</b> | 0.53***+            | ± 0.07        |
| Ventral Limb Diagonal Band Broca (VDB)       | <b>1.49</b> | ± <b>0.06</b> | <b>1.50</b>         | ± <b>0.07</b> |
| Horizontal Limb Diagonal Band of Broca (HDB) | 0.44        | ± 0.04        | 0.38                | ± 0.05        |
| Piriform Cortex (Piri)                       | 0.64        | ± 0.17        | <b>0.89</b>         | ± <b>0.05</b> |
| Insular Cortex (Ins)                         | <b>0.97</b> | ± <b>0.08</b> | <b>1.09</b>         | ± <b>0.06</b> |
| Cingulate Cortex (Cg1)                       | <b>1.07</b> | ± <b>0.05</b> | <b>0.92</b>         | ± <b>0.06</b> |
| Somatosensory Cortex (S1)                    | 0.75        | ± 0.08        | 0.72                | ± 0.02        |
| Anteroventral Nucleus (AV)                   | 0.52        | ± 0.09        | 0.58                | ± 0.06        |
| Anteromedial Nucleus (AM)                    | 0.79        | ± 0.04        | 0.75                | ± 0.06        |
| anterior Reticular Thalamus (aRT)            | <b>0.92</b> | ± <b>0.08</b> | <b>1.36*</b>        | ± <b>0.05</b> |
| Globus Pallidus (GP)                         | <b>1.13</b> | ± <b>0.02</b> | 0.83*               | ± 0.06        |
| Mediodorsal Nucleus (MD)                     | <b>0.89</b> | ± <b>0.06</b> | <b>1.31</b>         | ± <b>0.08</b> |
| Ventrolateral Nucleus (VL)                   | 0.78        | ± 0.05        | 0.80                | ± 0.05        |
| Ventromedial Nucleus (VM)                    | 0.83        | ± 0.07        | <b>0.88</b>         | ± <b>0.02</b> |
| Basolateral (BLA)                            | 0.58        | ± 0.06        | 0.64                | ± 0.06        |
| Central (CeA)                                | <b>1.05</b> | ± <b>0.06</b> | <b>0.97</b>         | ± <b>0.07</b> |
| Medial (MeA)                                 | <b>0.93</b> | ± <b>0.06</b> | <b>0.91</b>         | ± <b>0.06</b> |
| Retrosplenial Cortex (RSC)                   | 0.45        | ± 0.05        | <b>1.57***</b>      | ± <b>0.03</b> |
| Molecular Layer (DH.Mol)                     | <b>0.94</b> | ± <b>0.04</b> | <b>2.07***</b>      | ± <b>0.03</b> |
| Cornu Ammonis 1 (DH.CA1)                     | 0.53        | ± 0.05        | 0.58                | ± 0.06        |
| Cornu Ammonis 2 (DH.CA2)                     | 0.78        | ± 0.09        | 0.66                | ± 0.06        |
| Dentate Gyrus (DH.DG)                        | <b>1.20</b> | ± <b>0.08</b> | 0.68*               | ± 0.07        |
| Medial Geniculate (MG)                       | <b>1.22</b> | ± <b>0.04</b> | 0.51***             | ± 0.08        |
| Molecular Layer (VH.Mol)                     | 0.60        | ± 0.05        | <b>0.97</b>         | ± <b>0.11</b> |
| Dorsal Subiculum (VH.DS)                     | <b>0.93</b> | ± <b>0.09</b> | 0.68                | ± 0.06        |
| Cornu Ammonis 1 (VH.CA1)                     | <b>1.25</b> | ± <b>0.03</b> | 0.69**              | ± 0.09        |
| Cornu Ammonis 3 (VH.CA3)                     | <b>1.00</b> | ± <b>0.08</b> | <b>1.07</b>         | ± <b>0.08</b> |
| Dentate Gyrus (VH.DG)                        | <b>1.03</b> | ± <b>0.04</b> | <b>1.47**</b>       | ± <b>0.06</b> |
| Substantia Nigra pars Reticulata (SNR)       | <b>1.30</b> | ± <b>0.04</b> | <b>0.91***</b>      | ± <b>0.04</b> |
| Perirhinal Cortex (PRh)                      | 0.68        | ± 0.03        | 0.50                | ± 0.09        |
| Entorhinal Cortex (EntC)                     | <b>0.93</b> | ± <b>0.04</b> | 0.39***             | ± 0.03        |
| Substantia Nigra pars Compacta (SNC)         | <b>1.07</b> | ± <b>0.05</b> | 0.56**              | ± 0.08        |
| Mamillary Body (MB)                          | 0.39        | ± 0.05        | 0.45                | ± 0.04        |
| Ventral Tegmental Area (VTA)                 | <b>1.59</b> | ± <b>0.04</b> | 0.63***             | ± 0.11        |
| Dorsal Raphé (DR)                            | 0.51        | ± 0.07        | <b>1.15***</b>      | ± <b>0.06</b> |
| Median Raphé (MR)                            | <b>1.14</b> | ± <b>0.12</b> | <b>1.34</b>         | ± <b>0.06</b> |

Functional connectivity of the habenula (Hab) and its modification by chronic, intermittent WIN55,212-2 administration. Data shown represent the variable importance to the

projection (VIP) as derived from partial least squares regression (PLSR) analysis with the Hab as the “seed” brain region (dependent variable) and all other brain regions of interest (RoI) as the explanatory variables. Data were statistically analysed using Student’s t-test with Bonferroni post-hoc correction for multiple comparisons. Bold denote a significant functional connection to the seed region (95% confidence interval of the VIP statistic exceeds 0.8 threshold). \*denotes  $p < 0.05$ , \*\*denotes  $p < 0.01$  and \*\*\*denotes  $p < 0.001$  significant difference from control animals. DH denotes dorsal hippocampus, VH denotes ventral hippocampus.

Table S5. Functional Connectivity of the Mediodorsal Thalamic Nucleus

| RoI                                          | Control                   | WIN55,212-2 Treated          |
|----------------------------------------------|---------------------------|------------------------------|
| anterior Prelimbic Cortex (aPrL)             | <b>0.95</b> ± <b>0.06</b> | 0.56 ± 0.10                  |
| Frontal Association Cortex (FRA)             | <b>0.84</b> ± <b>0.05</b> | 0.34*** ± 0.03               |
| Dorsolateral Orbital Cortex (DLO)            | <b>1.01</b> ± <b>0.07</b> | 0.83 ± 0.13                  |
| Lateral Orbital Cortex (LO)                  | <b>0.87</b> ± <b>0.09</b> | <b>0.95</b> ± <b>0.03</b>    |
| Medial Orbital Cortex (MO)                   | <b>0.90</b> ± <b>0.08</b> | 0.62 ± 0.04                  |
| medial Prelimbic Cortex (mPrL)               | <b>1.19</b> ± <b>0.03</b> | <b>1.06</b> ± <b>0.04</b>    |
| Infralimbic Cortex (IL)                      | <b>1.31</b> ± <b>0.05</b> | <b>1.41</b> ± <b>0.09</b>    |
| Nucleus Accumbens Core (AcBc)                | 0.47 ± 0.04               | 0.76 ± 0.03                  |
| Nucleus Accumbens Shell (AcBsh)              | <b>1.18</b> ± <b>0.09</b> | <b>1.11</b> ± <b>0.04</b>    |
| Dorsolateral Striatum (DLST)                 | 0.74 ± 0.04               | <b>1.13*</b> ± <b>0.08</b>   |
| Ventromedial Striatum (VMST)                 | <b>1.54</b> ± <b>0.08</b> | 0.65*** ± 0.09               |
| Medial Septum (MS)                           | 0.57 ± 0.11               | <b>1.58***</b> ± <b>0.06</b> |
| Lateral Septum (LS)                          | 0.54 ± 0.07               | <b>1.09***</b> ± <b>0.04</b> |
| Ventral Limb Diagonal Band Broca (VDB)       | 0.71 ± 0.07               | <b>1.13*</b> ± <b>0.05</b>   |
| Horizontal Limb Diagonal Band of Broca (HDB) | 0.58 ± 0.07               | 0.37 ± 0.07                  |
| Piriform Cortex (Piri)                       | 0.53 ± 0.06               | 0.29 ± 0.05                  |
| Insular Cortex (Ins)                         | <b>1.37</b> ± <b>0.05</b> | 0.39*** ± 0.09               |
| Cingulate Cortex (Cg1)                       | <b>1.03</b> ± <b>0.10</b> | <b>1.55*</b> ± <b>0.06</b>   |
| Somatosensory Cortex (S1)                    | 0.68 ± 0.06               | 0.66 ± 0.06                  |
| Anteroventral Nucleus (AV)                   | <b>1.87</b> ± <b>0.05</b> | 0.77*** ± 0.06               |
| Anteromedial Nucleus (AM)                    | <b>1.71</b> ± <b>0.06</b> | <b>1.19**</b> ± <b>0.06</b>  |
| anterior Reticular Thalamus (aRT)            | <b>2.03</b> ± <b>0.03</b> | <b>1.37**</b> ± <b>0.07</b>  |
| Globus Pallidus (GP)                         | 0.72 ± 0.05               | <b>0.90***</b> ± <b>0.07</b> |
| Ventrolateral Nucleus (VL)                   | 0.55 ± 0.10               | 0.31 ± 0.08                  |
| Habenula (Hab)                               | <b>0.99</b> ± <b>0.06</b> | <b>1.43*</b> ± <b>0.06</b>   |
| Ventromedial Nucleus (VM)                    | <b>1.32</b> ± <b>0.05</b> | <b>1.44</b> ± <b>0.06</b>    |
| Basolateral (BLA)                            | 0.64 ± 0.06               | 0.47 ± 0.03                  |
| Central (CeA)                                | <b>1.22</b> ± <b>0.06</b> | <b>0.93</b> ± <b>0.08</b>    |
| Medial (MeA)                                 | 0.64 ± 0.04               | <b>1.14*</b> ± <b>0.10</b>   |
| Retrosplenial Cortex (RSC)                   | <b>1.09</b> ± <b>0.09</b> | <b>1.21</b> ± <b>0.07</b>    |
| Molecular Layer (DH.Mol)                     | 0.61 ± 0.05               | 0.79 ± 0.04                  |
| Cornu Ammonis 1 (DH.CA1)                     | 0.69 ± 0.08               | <b>1.07</b> ± <b>0.07</b>    |
| Cornu Ammonis 2 (DH.CA2)                     | 0.81 ± 0.06               | 0.81 ± 0.10                  |
| Dentate Gyrus (DH.DG)                        | 0.66 ± 0.06               | <b>1.00**</b> ± <b>0.03</b>  |
| Medial Geniculate (MG)                       | 0.61 ± 0.06               | 0.81 ± 0.04                  |
| Molecular Layer (VH.Mol)                     | 0.72 ± 0.05               | 0.80 ± 0.06                  |
| Dorsal Subiculum (Dsub)                      | 0.79 ± 0.07               | <b>1.13</b> ± <b>0.08</b>    |
| Cornu Ammonis 1 (VH.CA1)                     | 0.82 ± 0.08               | 0.74 ± 0.06                  |
| Cornu Ammonis 3 (VH.CA3)                     | <b>0.88</b> ± <b>0.08</b> | 0.36** ± 0.04                |
| Dentate Gyrus (VH.DG)                        | 0.74 ± 0.06               | <b>1.48***</b> ± <b>0.07</b> |
| Substantia Nigra pars Reticulata (SNR)       | 0.47 ± 0.05               | 0.51 ± 0.04                  |
| Perirhinal Cortex (PRh)                      | 0.73 ± 0.11               | <b>0.99**</b> ± <b>0.07</b>  |
| Entorhinal Cortex (EntC)                     | <b>0.88</b> ± <b>0.09</b> | 0.37** ± 0.03                |
| Substantia Nigra pars Compacta (SNC)         | 0.53 ± 0.14               | <b>0.84</b> ± <b>0.07</b>    |
| Mamillary Body (MB)                          | <b>0.91</b> ± <b>0.04</b> | <b>0.94</b> ± <b>0.08</b>    |
| Ventral Tegmental Area (VTA)                 | <b>1.02</b> ± <b>0.06</b> | <b>0.99</b> ± <b>0.08</b>    |
| Dorsal Raphé (DR)                            | <b>1.23</b> ± <b>0.07</b> | <b>1.05</b> ± <b>0.08</b>    |
| Median Raphé (MR)                            | 0.67 ± 0.02               | <b>1.42***</b> ± <b>0.08</b> |

Functional connectivity of the mediodorsal thalamic nucleus (MD) and its modification by chronic, intermittent WIN55,212-2 administration. Data shown represent the variable importance to the projection (VIP) as derived from partial least squares regression (PLSR) analysis with the MD as the “seed” brain region (dependent variable) and all other brain regions of interest (RoI) as the explanatory variables. Data were statistically analysed using



Student's t-test with Bonferroni post-hoc correction for multiple comparisons. Bold denote a significant functional connection to the seed region (95% confidence interval of the VIP statistic exceeds 0.8 threshold). \*denotes  $p < 0.05$ , \*\*denotes  $p < 0.01$  and \*\*\*denotes  $p < 0.001$  significant difference from control animals. DH denotes dorsal hippocampus, VH denotes ventral hippocampus.

Table S6. Functional Connectivity of the Globus Pallidus

| Rol                                          | Control                   | WIN55,212-2 Treated          |
|----------------------------------------------|---------------------------|------------------------------|
| anterior Prelimbic Cortex (aPrL)             | <b>1.10</b> ± <b>0.07</b> | <b>0.95</b> ± <b>0.06</b>    |
| Frontal Association Cortex (FRA)             | 0.71 ± 0.10               | <b>1.07</b> ± <b>0.04</b>    |
| Dorsolateral Orbital Cortex (DLO)            | 0.72 ± 0.05               | <b>1.34**</b> ± <b>0.09</b>  |
| Lateral Orbital Cortex (LO)                  | <b>1.01</b> ± <b>0.09</b> | 0.70 ± 0.04                  |
| Medial Orbital Cortex (MO)                   | 0.55 ± 0.06               | 0.61 ± 0.06                  |
| medial Prelimbic Cortex (mPrL)               | 0.66 ± 0.05               | <b>1.30***</b> ± <b>0.05</b> |
| Infralimbic Cortex (IL)                      | 0.63 ± 0.05               | 0.71 ± 0.07                  |
| Nucleus Accumbens Core (AcbC)                | <b>0.90</b> ± <b>0.05</b> | 0.53* ± 0.05                 |
| Nucleus Accumbens Shell (AcbSh)              | 0.73 ± 0.05               | 0.61 ± 0.04                  |
| Dorsolateral Striatum (DLST)                 | <b>1.61</b> ± <b>0.02</b> | 0.52*** ± 0.03               |
| Ventromedial Striatum (VMST)                 | <b>1.02</b> ± <b>0.08</b> | 0.57* ± 0.05                 |
| Medial Septum (MS)                           | <b>1.45</b> ± <b>0.04</b> | 0.67*** ± 0.03               |
| Lateral Septum (LS)                          | 0.80 ± 0.05               | 0.73 ± 0.05                  |
| Ventral Limb Diagonal Band Broca (VDB)       | <b>1.66</b> ± <b>0.03</b> | 0.51*** ± 0.03               |
| horizontal Limb Diagonal Band of Broca (HDB) | <b>1.39</b> ± <b>0.05</b> | 0.52*** ± 0.10               |
| Piriform Cortex (Piri)                       | <b>1.14</b> ± <b>0.08</b> | 0.68* ± 0.05                 |
| Insular Cortex (Ins)                         | 0.54 ± 0.04               | 0.76 ± 0.10                  |
| Cingulate Cortex (Cg1)                       | 0.59 ± 0.04               | <b>1.26***</b> ± <b>0.04</b> |
| Somatosensory Cortex (S1)                    | <b>1.49</b> ± <b>0.07</b> | 0.46*** ± 0.04               |
| Anteroventral Nucleus (AV)                   | 0.79 ± 0.06               | <b>1.03</b> ± <b>0.08</b>    |
| Anteromedial Nucleus (AM)                    | <b>1.01</b> ± <b>0.06</b> | <b>1.11</b> ± <b>0.09</b>    |
| anterior Reticular Thalamus (aRT)            | 0.64 ± 0.03               | 0.52 ± 0.13                  |
| Mediodorsal Nucleus (MD)                     | 0.61 ± 0.04               | <b>0.98*</b> ± <b>0.07</b>   |
| Ventrolateral Nucleus (VL)                   | <b>1.30</b> ± <b>0.03</b> | <b>1.14</b> ± <b>0.06</b>    |
| Habenula (Hab)                               | <b>1.15</b> ± <b>0.03</b> | <b>0.93</b> ± <b>0.07</b>    |
| Ventromedial Nucleus (VM)                    | 0.50 ± 0.05               | <b>0.97</b> ± <b>0.11</b>    |
| Basolateral (BLA)                            | <b>1.08</b> ± <b>0.05</b> | 0.51*** ± 0.07               |
| Central (CeA)                                | 0.79 ± 0.08               | 0.38* ± 0.03                 |
| Medial (MeA)                                 | <b>1.59</b> ± <b>0.04</b> | <b>1.09***</b> ± <b>0.06</b> |
| Retrosplenial Cortex (RSC)                   | 0.38 ± 0.07               | 0.54 ± 0.09                  |
| Molecular Layer (DH.Mol)                     | <b>1.25</b> ± <b>0.05</b> | 0.62** ± 0.09                |
| Cornu Ammonis 1 (DH.CA1)                     | <b>1.17</b> ± <b>0.05</b> | <b>1.28</b> ± <b>0.04</b>    |
| Cornu Ammonis 2 (DH.CA2)                     | 0.63 ± 0.09               | <b>0.98</b> ± <b>0.07</b>    |
| Dentate Gyrus (DH.DG)                        | 0.45 ± 0.10               | <b>0.89</b> ± <b>0.06</b>    |
| Medial Geniculate (MG)                       | <b>1.04</b> ± <b>0.05</b> | <b>0.97</b> ± <b>0.05</b>    |
| Molecular Layer (VH.Mol)                     | 0.57 ± 0.04               | 0.76 ± 0.05                  |
| Dorsal Subiculum (VH.DS)                     | <b>1.23</b> ± <b>0.07</b> | <b>2.07***</b> ± <b>0.03</b> |
| Cornu Ammonis 1 (VH.CA1)                     | <b>0.90</b> ± <b>0.06</b> | <b>0.99</b> ± <b>0.06</b>    |
| Cornu Ammonis 3 (VH.CA3)                     | <b>1.55</b> ± <b>0.10</b> | 0.79*** ± 0.03               |
| Dentate Gyrus (VH.DG)                        | 0.50 ± 0.05               | <b>1.08*</b> ± <b>0.11</b>   |
| Substantia Nigra pars Reticulata (SNR)       | 0.50 ± 0.03               | <b>0.88***</b> ± <b>0.03</b> |
| Perirhinal Cortex (PRh)                      | 0.45 ± 0.10               | <b>1.12**</b> ± <b>0.05</b>  |
| Entorhinal Cortex (EntC)                     | <b>0.97</b> ± <b>0.06</b> | <b>1.45</b> ± <b>0.09</b>    |
| Substantia Nigra pars Compacta (SNC)         | 0.72 ± 0.04               | 0.53 ± 0.07                  |
| Mamillary Body (MB)                          | 0.50 ± 0.09               | 0.79 ± 0.06                  |
| Ventral Tegmental Area (VTA)                 | <b>1.50</b> ± <b>0.04</b> | <b>1.10**</b> ± <b>0.05</b>  |
| Dorsal Raphé (DR)                            | 0.66 ± 0.05               | <b>1.65***</b> ± <b>0.05</b> |
| Median Raphé (MR)                            | 0.64 ± 0.06               | <b>1.87***</b> ± <b>0.07</b> |

Functional connectivity of the Globus Pallidus (GP) and its modification by chronic, intermittent WIN55,212-2 administration. Data shown represent the variable importance to

the projection (VIP) as derived from partial least squares regression (PLSR) analysis with the GP as the “seed” brain region (dependent variable) and all other brain regions of interest (RoI) as the explanatory variables. Data were statistically analysed using Student’s t-test with Bonferroni post-hoc correction for multiple comparisons. Bold denote a significant functional connection to the seed region (95% confidence interval of the VIP statistic exceeds 0.8 threshold). \*denotes  $p < 0.05$ , \*\*denotes  $p < 0.01$  and \*\*\*denotes  $p < 0.001$  significant difference from control animals. DH denotes dorsal hippocampus, VH denotes ventral hippocampus.
